# Supplementary material for: Infections Caused by Moellerella wisconsensis: A Case Report and a Systematic Review of the Literature
Source: MDPI journal article supplement (doi:10.3390/microorganisms10050892), 2022-04-24
Supplement: s1 [file s1]

# Infections Caused by *Moellerella wisconsensis*: A Case Report and a Systematic Review of the Literature

Table S1. Antibigram.

| Culture: Blood Culture                            |                        |        |
|---------------------------------------------------|------------------------|--------|
| Isolated Microbe: <i>Moellerella wisconsensis</i> |                        |        |
| Antibiotic                                        | Antibiotic Sensitivity | M.I.C. |
| Amikacin                                          | R                      | >32    |
| Amoxicillin/Clavulanate                           | S                      | ≤4/2   |
| Ampicillin                                        | R                      | >4     |
| Cefepime                                          | R                      | >16    |
| Cefoxitin                                         | R                      | >16    |
| Ceftazidime                                       | R                      | >16    |
| Ceftriaxone                                       | R                      | >32    |
| Cefuroxime                                        | R                      | >16    |
| Ciprofloxacin                                     | R                      | >2     |
| Colistin                                          | R                      | >2     |
| Ertapenem                                         | R                      | >4     |
| Gentamicin                                        | R                      | >8     |
| Imipenem                                          | S                      | ≤2     |
| Levofloxacin                                      | R                      | >4     |
| Meropenem                                         | S                      | ≤4     |
| Piperacillin/Tazobactam                           | S                      | 8/4    |
| Tigecycline                                       | S                      | ≤1     |
| Trimethoprim/Sulfamethoxazole                     | R                      | >4/76  |

R: Resistant, S: Sensitive, I: Intermediate, M.I.C.: minimum inhibitory concentration

Same antibiograms for urine culture and pigtail end culture

Table S2. Reasons for exclusions of studies from the systematic review.

| Study                  | Reasons of Exclusion                                                                                                   |
|------------------------|------------------------------------------------------------------------------------------------------------------------|
| Stock et al. [1]       | Report of <i>Moellerella wisconsensis</i> case isolated from human peritoneum, but the citation could not be retrieved |
| Sandfort et al. [2]    | <i>Moellerella wisconsensis</i> isolated from the oral cavity of a wild raccoon                                        |
| Zambarbieri et al. [3] | <i>Moellerella wisconsensis</i> isolated from the urinary tract of a dog                                               |
| Casalinuovo et al. [4] | <i>Moellerella wisconsensis</i> isolated from the lung of a goat                                                       |
| Cabadajová et al. [5]  | Study could not be retrieved                                                                                           |

1. Stock I, Falsen E, Wiedemann B. *Moellerella wisconsensis*: identification, natural antibiotic susceptibility and its dependency on the medium applied. *Diagn Microbiol Infect Dis.* 2003;45:1-11. [https://doi.org/10.1016/s0732-8893\(02\)00483-2](https://doi.org/10.1016/s0732-8893(02)00483-2)
2. Sandfort RF, Murray W, Janda JM. *Moellerella wisconsensis* isolated from the oral cavity of a wild raccoon (*Procyon lotor*). *Vector Borne Zoonotic Dis.* 2002;2:197-9. <https://doi.org/10.1089/15303660260613765>
3. Zambarbieri J, Grilli G, Vitiello T, Scarpa P. Urinary tract infection by atypical uropathogens in dogs. *Vet Ital.* 2021;57:89-92. <https://doi.org/10.12834/VetIt.2110.12149.1>
4. Casalnuovo F, Musarella R. Isolation of *Moellerella wisconsensis* from the lung of a goat. *Vet Microbiol.* 2009;138:401-2. <https://doi.org/10.1016/j.vetmic.2009.03.028>
5. Cabadajova D, Kudrna L. [*Moellerella wisconsensis*--the first isolation and identification of a new genus and species of the family Enterobacteriaceae in Czechoslovakia]. *Cesk Epidemiol Mikrobiol Imunol.* 1988;37:45-8.
